# Supplementary material for: A turn-on fluorescence sensor for the highly selective detection of Al3+ based on diarylethene and its application on test strips
Source: Royal Society of Chemistry journal article supplement (doi:10.1039/c9ra00716d), 2019-01-01
Supplement: c9ra00716d1.pdf [file c9ra00716d1.pdf]

## Supporting Information

### A turn-on fluorescence sensor for highly selective detection of Al<sup>3+</sup> based on diarylethene and its application by test strips

Junfei Lv, Yinglong Fu, Gang, Liu, Congbin Fan\* and Shouzhi Pu\*

*Jiangxi Key Laboratory of Organic Chemistry, Jiangxi Science and Technology Normal  
University, Nanchang 330013, PR China*

\* *Corresponding authors.* Tel./fax: +0791 83805212 (C. Fan), +86 791 83831996 (S. Pu).

*E-mail:* congbinfan@163.com (C. Fan), pushouzhi@tsinghua.org.cn (S. Pu).

## Contents

**Figure S1.** <sup>1</sup>H NMR spectrum of **10**.

**Figure S2.** <sup>13</sup>C NMR spectrum of **10**.

**Figure S3.** IR spectra of **10**.

**Figure S4.** MS-ESI spectrum of **10**.

**Figure S5.** Absorption spectra changes of **1C** induced by Al<sup>3+</sup>/EDTA in methanol solution (2.0 × 10<sup>-5</sup> mol L<sup>-1</sup>).

**Figure S6.** The binding constant of **10** with Al<sup>3+</sup> was calculated to be 4.72 × 10<sup>4</sup> L·mol<sup>-1</sup>.

**Figure S7.** The limit of detection (LOD) for Al<sup>3+</sup> was 1.24 × 10<sup>-5</sup> mol L<sup>-1</sup>.

**Figure S8.** Fluorescence photos of Al<sup>3+</sup> at different concentrations.

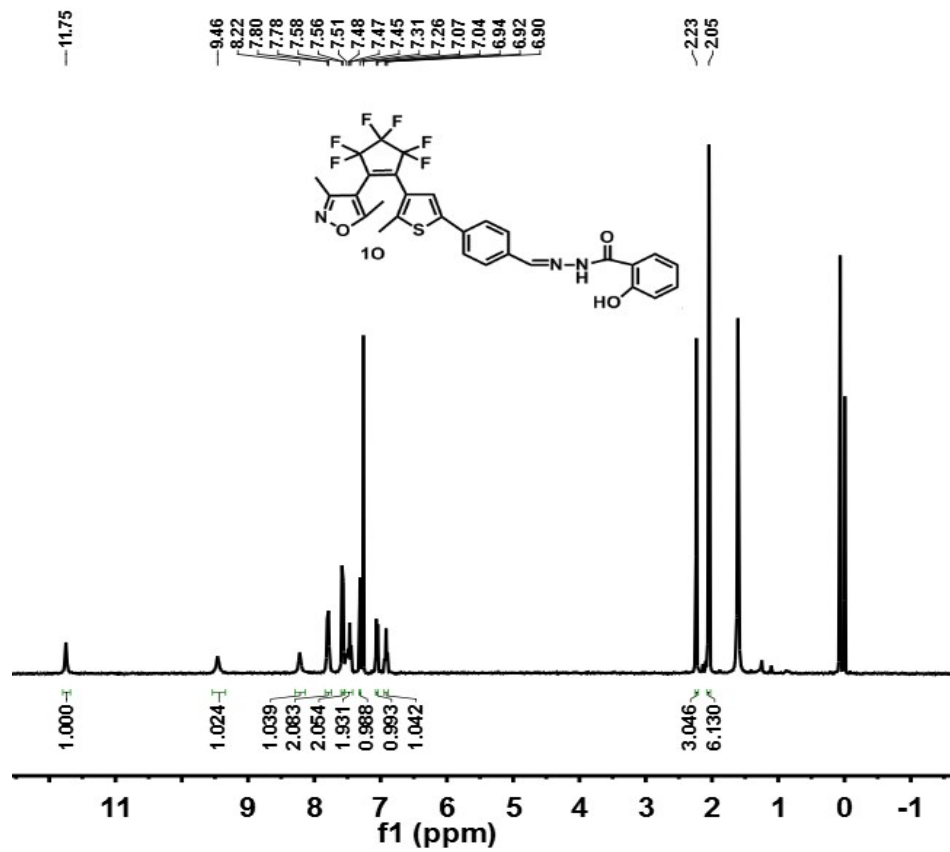

Figure S1.  $^1\text{H NMR}$  spectrum of 10.

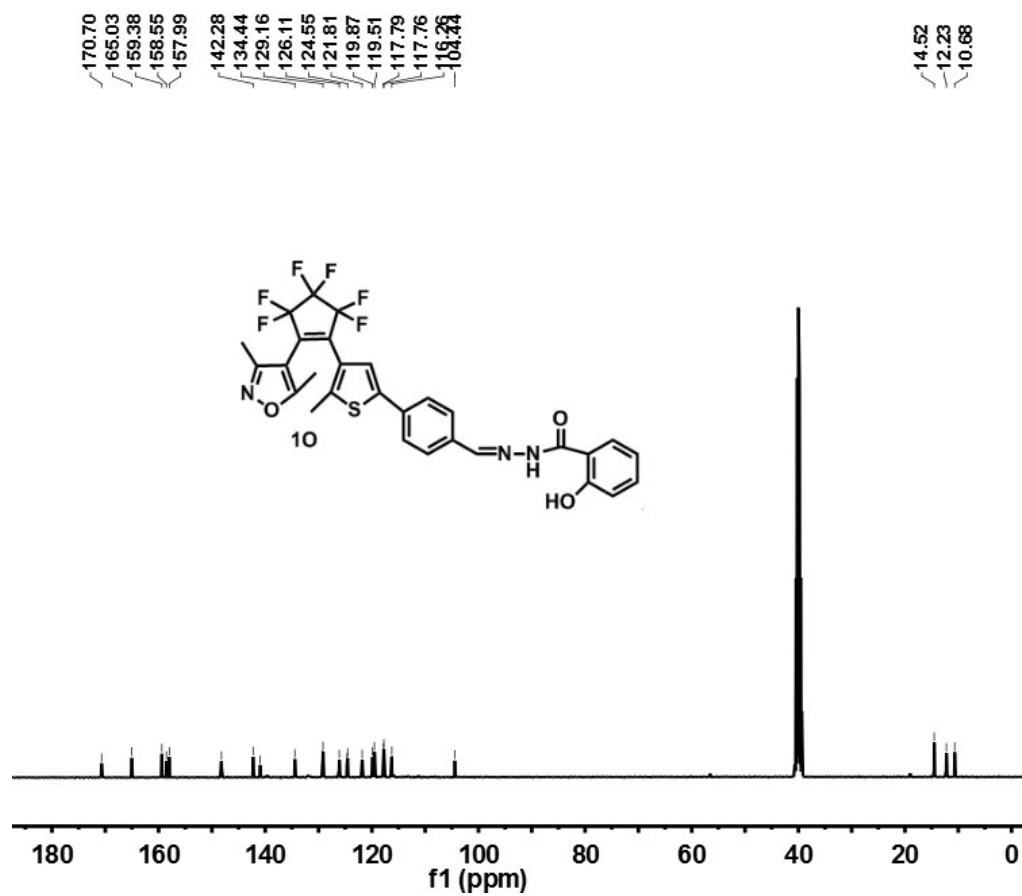

Figure S2. <sup>13</sup>C NMR spectrum of 10.

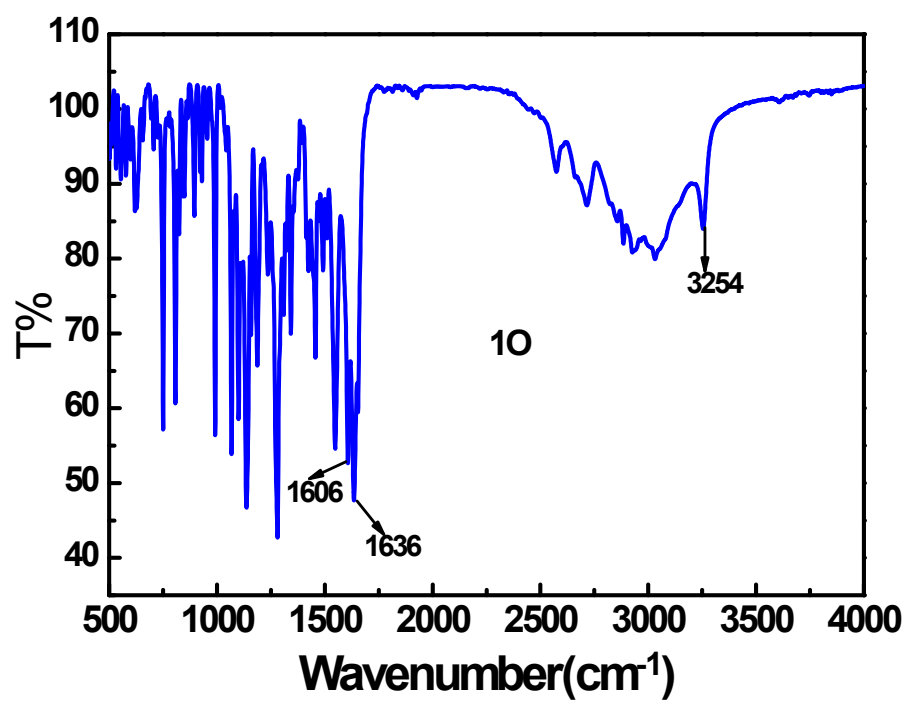

Figure S3. IR spectra of 10.

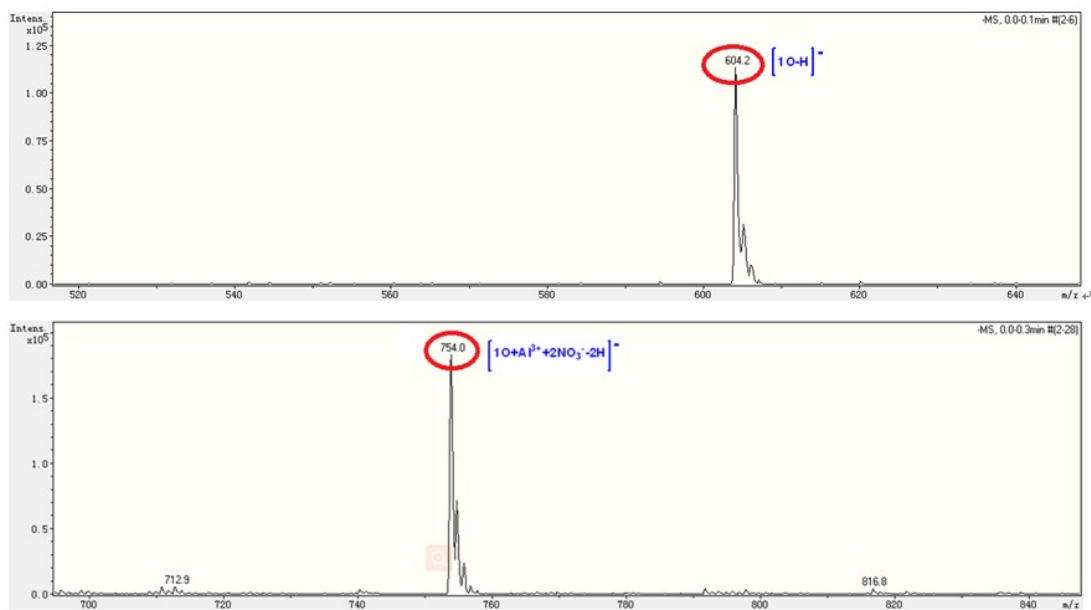

**Figure S4.** MS-ESI spectrum of **10** and **10-Al<sup>3+</sup>**.

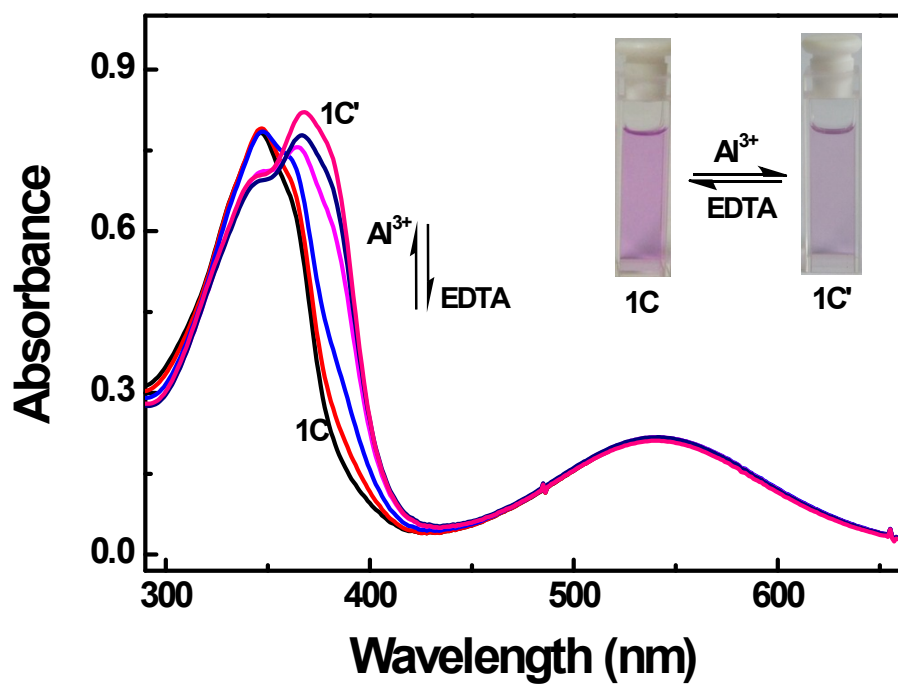

Figure S5. Absorption spectra changes of 1C induced by Al<sup>3+</sup>/EDTA in methanol solution ( $2.0 \times 10^{-5} \text{ mol L}^{-1}$ ).

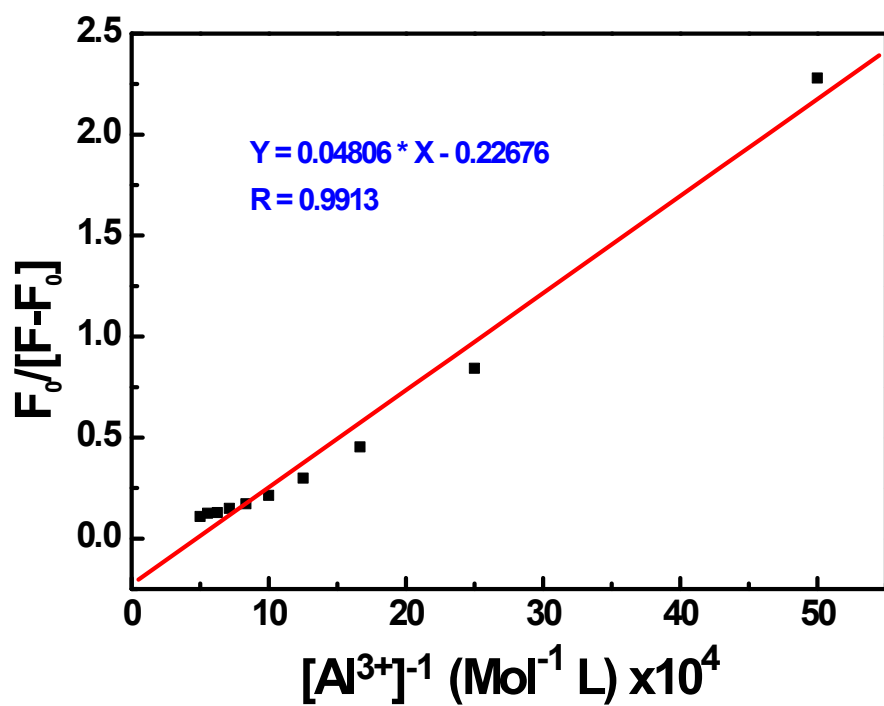

Figure S6. Hildebrand-Benesi plot based on the 1 : 1, the association constant of **10** with  $Al^{3+}$

was calculated to be  $4.72 \times 10^4 L \cdot mol^{-1}$ .

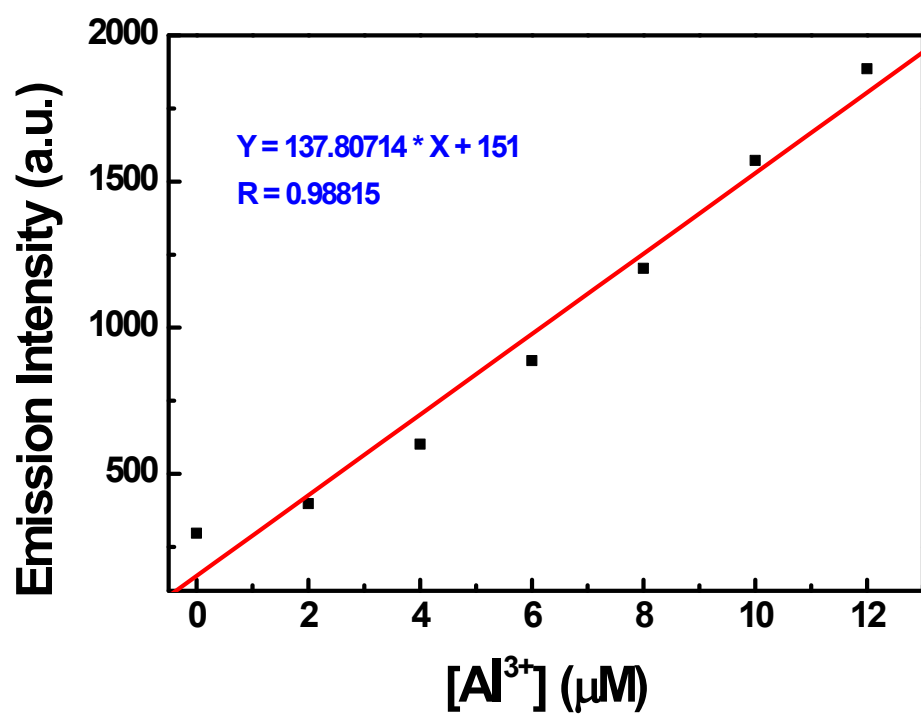

Figure S7. The limit of detection (LOD) for  $\text{Al}^{3+}$  was  $1.24 \times 10^{-5} \text{ mol L}^{-1}$ .



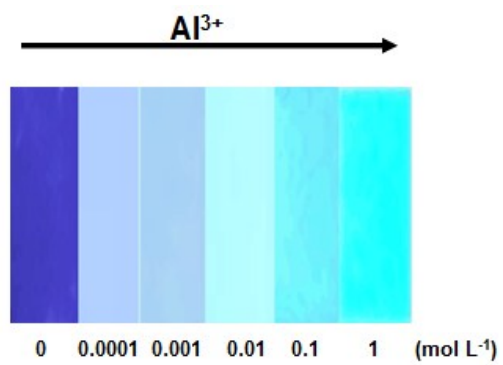

**Figure S8.** Fluorescence photos of  $\text{Al}^{3+}$  at different concentrations.
